# Supplementary material for: Anti-CD19 chimeric antigen receptor T-cell therapy has less efficacy in Richter transformation than in de novo large B-cell lymphoma and transformed low-grade B-cell lymphoma
Source: PubMed Central journal article supplement — Haematologica. 2024 Jun 20;109(11):3566–77. doi: 10.3324/haematol.2023.284664 (PMC11532690; doi:10.3324/haematol.2023.284664), 2024-06-20
Supplement: 2023_284664_BENJAMINI_SUPPL.pdf [file 2023_284664_BENJAMINI_SUPPL.pdf]

# Anti-CD19 chimeric antigen receptor T-cell therapy has less efficacy in Richter transformation than in *de novo* large B-cell lymphoma and transformed low-grade B-cell lymphoma

Ohad Benjamini,<sup>1,2\*</sup> Shalev Fried,<sup>1,2\*</sup> Roni Shouval,<sup>3,4</sup> Jessica R. Flynn,<sup>5</sup> Ofrat Beyar-Katz,<sup>6,7</sup> Lori A. Leslie,<sup>8</sup> Tsila Zuckerman,<sup>6</sup> Ronit Yerushalmi,<sup>1,2</sup> Noga Shem-Tov,<sup>1,2</sup> Maria Lia Palomba,<sup>3,4</sup> Ivetta Danylesko,<sup>1,2</sup> Inbal Sdayoor,<sup>1,2</sup> Hila Malka,<sup>6</sup> Orit Itzhaki,<sup>9</sup> Hyung Suh,<sup>8</sup> Sean M. Devlin,<sup>5</sup> Ronit Marcus,<sup>1,2</sup> Parastoo B. Dahi,<sup>3,4</sup> Elad Jacoby,<sup>2,10</sup> Gunjan L. Shah,<sup>3</sup> Craig S. Sauter,<sup>11</sup> Andrew Ip,<sup>8,12</sup> Miguel-Angel Perales,<sup>3,4</sup> Arnon Nagler,<sup>1,2</sup> Avichai Shimoni,<sup>1,2</sup> Michael Scordo<sup>3,4#</sup> and Abraham Avigdor<sup>1,2#</sup>

<sup>1</sup>Division of Hematology and Bone Marrow Transplantation, Chaim Sheba Medical Center, Tel Hashomer, Israel; <sup>2</sup>School of Medicine, Faculty of Medical and Health Sciences, Tel Aviv University, Tel-Aviv, Israel; <sup>3</sup>Department of Medicine, Adult Bone Marrow Transplant Service, Cellular Therapy Service, Memorial Sloan Kettering Cancer Center, New York, NY, USA; <sup>4</sup>Department of Medicine Weill Cornell Medical College, New York, NY, USA; <sup>5</sup>Department of Biostatistics and Epidemiology, Memorial Sloan Kettering Cancer Center, New York, NY, USA; <sup>6</sup>Department of Hematology and Bone Marrow Transplantation, Rambam Health Care Campus, Haifa, Israel; <sup>7</sup>The Ruth and Bruce Rappaport Faculty of Medicine, Technion, Haifa, Israel; <sup>8</sup>John Theurer Cancer Center, Hackensack, University Medical Center, Hackensack New Jersey, NJ, USA; <sup>9</sup>Ella Lemelbaum Institute for Immuno Oncology, Chaim Sheba Medical Center, Tel Hashomer, Israel; <sup>10</sup>Department of Pediatric Hematology-Oncology, Safra Children's Hospital, Chaim Sheba Medical Center, Tel Hashomer, Israel; <sup>11</sup>Department of Hematology and Medical Oncology, Cleveland Clinic, Cleveland, OH, USA and <sup>12</sup>Hackensack Meridian School of Medicine, Nutley, NJ, USA

\*OB and SF contributed equally as first authors.

#MS and AA contributed equally as senior authors.

**Correspondence:** O. Benjamini  
[ohad.benjamini@sheba.health.gov.il](mailto:ohad.benjamini@sheba.health.gov.il)

**Received:** November 26, 2023.

**Accepted:** June 13, 2024.

**Early view:** June 20, 2024.

<https://doi.org/10.3324/haematol.2023.284664>

©2024 Ferrata Storti Foundation

Published under a CC BY-NC license

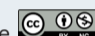

Table S1 Univariate and multivariate analysis to identify prognostic factors for progression free survival.

| Variable                      | Univariate analysis |                 |         | Multivariate analysis |                 |         |
|-------------------------------|---------------------|-----------------|---------|-----------------------|-----------------|---------|
|                               | N, Event            | HR(95% CI)      | p-value | N, Event              | HR(95% CI)      | p-value |
| Cohort                        | 454,252             |                 | <0.001  | 419,232               |                 | <0.0001 |
| De novo LBCL                  |                     | - -             |         |                       | - -             |         |
| Transformed iNHL              |                     | 0.71(0.59-0.86) |         |                       | 0.75(0.65-0.86) |         |
| Transformed CLL               |                     | 1.23(1.03,1.47) |         |                       | 1.55(1.29,1.87) |         |
| Age at CAR-T infusion         | 454,252             |                 | 0.36    | 419,232               |                 | 0.19    |
|                               |                     | 1.00(0.99-1.0)  |         |                       | 0.99(0.98-1.00) |         |
| LDH range pre-lymphodepletion | 427,237             |                 | 0.027   | 419,232               |                 | 0.064   |
| normal                        |                     | - -             |         |                       | - -             |         |
| elevated                      |                     | 1.63(1.06-2.50) |         |                       | 1.62(0.97-2.69) |         |
| CAR-T costimulatory domain    | 454,252             |                 | 0.16    | 419,232               |                 | 0.1     |
| 4-1BB                         |                     | - -             |         |                       | - -             |         |
| CD28                          |                     | 0.87(0.71-1.06) |         |                       | 0.8(0.6-1.05)   |         |
| Pre-apheresis treatment lines | 446,247             |                 | 0.15    | 419,232               |                 | 0.071   |
| ≤3                            |                     | - -             |         |                       | - -             |         |
| 4-5                           |                     | 1.07(0.77-1.48) |         |                       | 0.95(0.65-1.37) |         |
| ≥6                            |                     | 1.25(1.00-1.56) |         |                       | 1.21(0.89-1.65) |         |

<sup>1</sup>HR = Hazard Ratio, CI = Confidence Interval, PFS progression free survival

Table S2 Univariate and multivariate analysis to identify prognostic factors for relapse.

| Variable                                                      | Univariate analysis |                                           |         | Multivariate analysis |                                           |         |
|---------------------------------------------------------------|---------------------|-------------------------------------------|---------|-----------------------|-------------------------------------------|---------|
|                                                               | N, Event            | HR(95% CI)                                | p-value | N, Event              | HR(95% CI)                                | p-value |
| Cohort<br>De novo LBCL<br>Transformed iNHL<br>Transformed CLL | 454,252             | - -<br>0.75(0.71-0.80)<br>1.38(1.17,0.80) | <0.001  | 419,225               | - -<br>0.79(0.73-0.86)<br>1.76(1.36,2.29) | <0.0001 |
| Age at CAR-T infusion                                         | 454,252             | 1.00(0.99-1.0)                            | 0.40    | 419,225               | 0.99(0.98-1.00)                           | 0.13    |
| LDH range pre-lymphodepletion<br>normal<br>elevated           | 427,229             | 1.71(1.13-2.60)                           | 0.012   | 419,225               | 1.73(1.05-2.83)                           | 0.031   |
| CAR-T costimulatory domain<br>4-1BB<br>CD28                   | 454,242             | 0.81(0.66-0.99)                           | 0.038   | 419,225               | 0.71(0.55-0.92)                           | 0.010   |
| Pre-apheresis treatment lines<br>≤3<br>4-5<br>≥6              | 446,238             | 1.06(0.74-1.54)<br>1.17(0.85-1.61)        | 0.62    | 419,225               | 0.94(0.61-1.45)<br>1.15(0.80-1.65)        | 0.31    |

<sup>1</sup>HR = Hazard Ratio, CI = Confidence Interval, PFS progression free survival

Table S3 Univariate exploratory analysis to identify prognostic factors for survival and progression free survival in patients with Richters transformation.

| Variable                                            | Univariate analysis - OS |                 |         | Univariate analysis - PFS |                 |         |
|-----------------------------------------------------|--------------------------|-----------------|---------|---------------------------|-----------------|---------|
|                                                     | N, Event                 | HR(95% CI)      | p-value | N, Event                  | HR(95% CI)      | p-value |
| Age at CAR-T infusion                               | 30,17                    | 0.96(0.91-1.0)  | 0.075   | 30,18                     | 0.93(0.87-1.00) | 0.046   |
| LDH range pre-lymphodepletion<br>normal<br>elevated | 29,17                    | 1.60(0.89-2.88) | 0.12    | 29,18                     | 1.72(0.76-3.89) | 0.19    |
| Pre-apheresis treatment lines<br>≤3<br>4-5<br>≥6    | 28,17                    | 2.00(1.25-3.19) | <0.001  | 28,17                     | 1.48(1.01-2.16) | 0.002   |
| Bridging BTK exposure<br>No exposed<br>Exposed      | 30,17                    | 1.51(0.51-4.44) | 0.45    | 30,18                     | 1.18(0.26-5.27) | 0.83    |
| Disease stage at apheresis<br>≤II<br>≥III-IV        | 27,16                    | 1.61(0.70-3.71) | 0.26    | 30,17                     | 1.58(0.81-3.06) | 0.18    |
| Pre-CAR-T KPS (categorized)<br>≥90<br><90           | 30,17                    | 1.29(0.76-2.19) | 0.34    | 30,17                     | 0.96(0.41-2.26) | 0.34    |

<sup>1</sup>HR = Hazard Ratio, CI = Confidence Interval, OS overall survival, PFS progression free survival, KPS Karnofsky performance status

Table S4 Univariate and multivariate analysis to identify prognostic factors for overall survival excluding patients treated with POC CAR T .

| Variable                      | Univariate analysis |                 |         | Multivariate analysis |                 |         |
|-------------------------------|---------------------|-----------------|---------|-----------------------|-----------------|---------|
|                               | N, Event            | HR(95% CI)      | p-value | N, Event              | HR(95% CI)      | p-value |
| Cohort                        | 373,141             |                 | <0.001  | 342,131               |                 | <0.001  |
| De novo LBCL                  |                     | - -             |         |                       | - -             |         |
| Transformed iNHL              |                     | 0.65(0.56-0.76) |         |                       | 0.61(0.50-0.75) |         |
| Transformed CLL               |                     | 1.98(1.12-3.50) |         |                       | 2.26(1.68,3.06) |         |
| Age at CAR-T infusion         | 373,141             |                 | <0.001  | 342, 131              |                 | 0.021   |
|                               |                     | 1.01(1.01-1.02) |         |                       | 1.01(1.00-1.02) |         |
| LDH range pre-lymphodepletion | 350,134             |                 | <0.001  | 342, 131              |                 | <0.001  |
| normal                        |                     | - -             |         |                       | - -             |         |
| elevated                      |                     | 3.01(2.07-4.38) |         |                       | 3.08(2.00-4.74) |         |
| CAR-T costimulatory domain    | 373,141             |                 | 0.074   | 342, 131              |                 | 0.60    |
| 4-1BB                         |                     | - -             |         |                       | - -             |         |
| CD28                          |                     | 0.82(0.65-1.02) |         |                       | 0.94(0.74-1.19) |         |
| Pre-apheresis treatment lines | 365,138             |                 | 0.080   | 342, 131              |                 | <0.001  |
| ≤3                            |                     | - -             |         |                       | - -             |         |
| 4-5                           |                     | 1.12(0.79-1.59) |         |                       | 0.97(0.55-1.70) |         |
| ≥6                            |                     | 1.65(1.04-2.61) |         |                       | 1.56(1.04-2.34) |         |

<sup>1</sup>HR = Hazard Ratio, CI = Confidence Interval, PFS progression free survival

Table S5 Univariate and multivariate analysis to identify prognostic factors for progression free survival excluding patients treated with POC CAR T .

| Variable                                                      | Univariate analysis |                                           |         | Multivariate analysis |                                           |         |
|---------------------------------------------------------------|---------------------|-------------------------------------------|---------|-----------------------|-------------------------------------------|---------|
|                                                               | N, Event            | HR(95% CI)                                | p-value | N, Event              | HR(95% CI)                                | p-value |
| Cohort<br>De novo LBCL<br>Transformed iNHL<br>Transformed CLL | 374,208             | - -<br>0.77(0.66-0.90)<br>1.43(1.07-1.91) | <0.001  | 343,191               | - -<br>0.81(0.68-0.96)<br>1.56(0.99,2.46) | <0.001  |
| Age at CAR-T infusion                                         | 374,208             | 1.00(1.00-1.01)                           | <0.76   | 343, 191              | 1.00(0.99-1.00)                           | 0.19    |
| LDH range pre-lymphodepletion<br>normal<br>elevated           | 351,196             | 1.67(1.01-2.77)                           | <0.045  | 343, 191              | 1.65(0.89-3.06)                           | 0.11    |
| CAR-T costimulatory domain<br>4-1BB<br>CD28                   | 374,208             | 0.77(0.60-1.03)                           | 0.083   | 343, 191              | 0.78(0.58-1.04)                           | 0.092   |
| Pre-apheresis treatment lines<br>≤3<br>4-5<br>≥6              | 366,203             | 0.98(0.69-1.40)<br>1.25(0.95-1.65)        | 0.17    | 343, 191              | 0.88(0.54-1.44)<br>1.21(0.82-1.8)         | <0.001  |

<sup>1</sup>HR = Hazard Ratio, CI = Confidence Interval, PFS progression free survival

Supplementary figure S1 Cumulative incidence of neutropenia and thrombocytopenia.

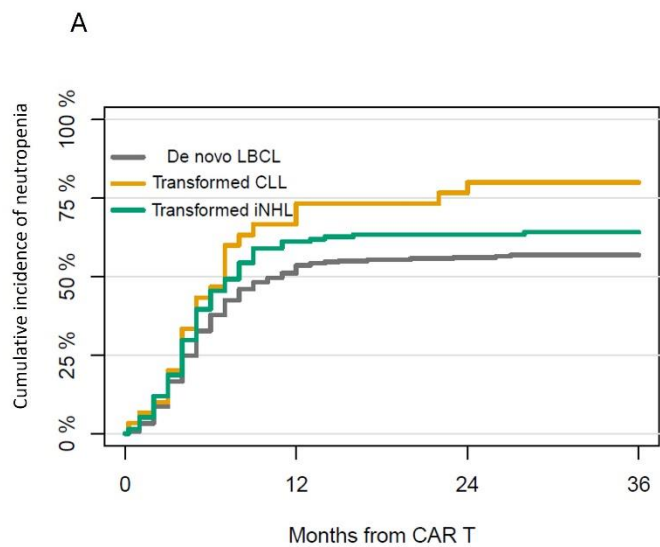

|         |     |     |     |    |
|---------|-----|-----|-----|----|
| At-risk | 278 | 135 | 114 | 96 |
|         | 30  | 9   | 6   | 5  |
|         | 134 | 52  | 47  | 40 |

| Characteristic   | N   | Days 30        | Days 60        | p-value <sup>1</sup> |
|------------------|-----|----------------|----------------|----------------------|
| cohort           | 442 |                |                | 0.025                |
| DeNovo LBCL      |     | 57% (51%, 62%) | 58% (52%, 63%) |                      |
| RT               |     | 80% (59%, 91%) | 80% (59%, 91%) |                      |
| Transformed iNHL |     | 64% (55%, 72%) | 66% (57%, 73%) |                      |

<sup>1</sup>Gray's Test

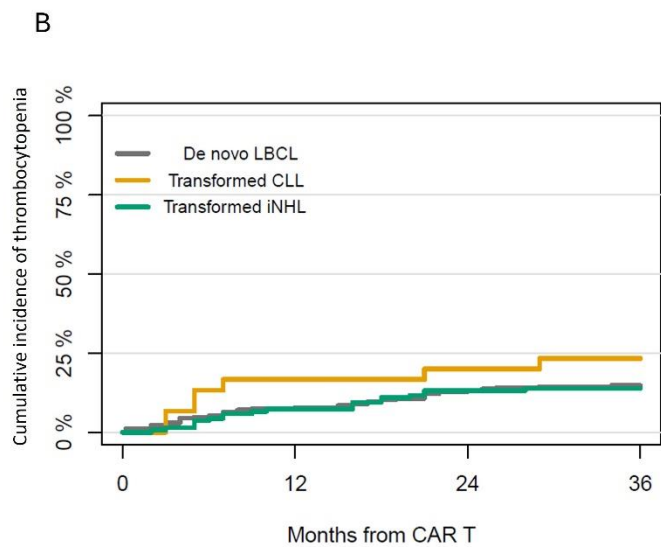

|         |     |     |     |     |
|---------|-----|-----|-----|-----|
| At-risk | 271 | 250 | 223 | 186 |
|         | 30  | 23  | 21  | 17  |
|         | 137 | 126 | 117 | 103 |

| Characteristic   | N   | Days 30         | Days 60         | p-value <sup>1</sup> |
|------------------|-----|-----------------|-----------------|----------------------|
| cohort           | 438 |                 |                 | 0.5                  |
| DeNovo LBCL      |     | 14% (11%, 19%)  | 15% (11%, 20%)  |                      |
| RT               |     | 23% (10%, 40%)  | 23% (10%, 40%)  |                      |
| Transformed iNHL |     | 14% (8.7%, 20%) | 15% (9.3%, 21%) |                      |

<sup>1</sup>Gray's Test

Supplementary figure S2 Survival outcomes according excluding patients treated with POC CAR

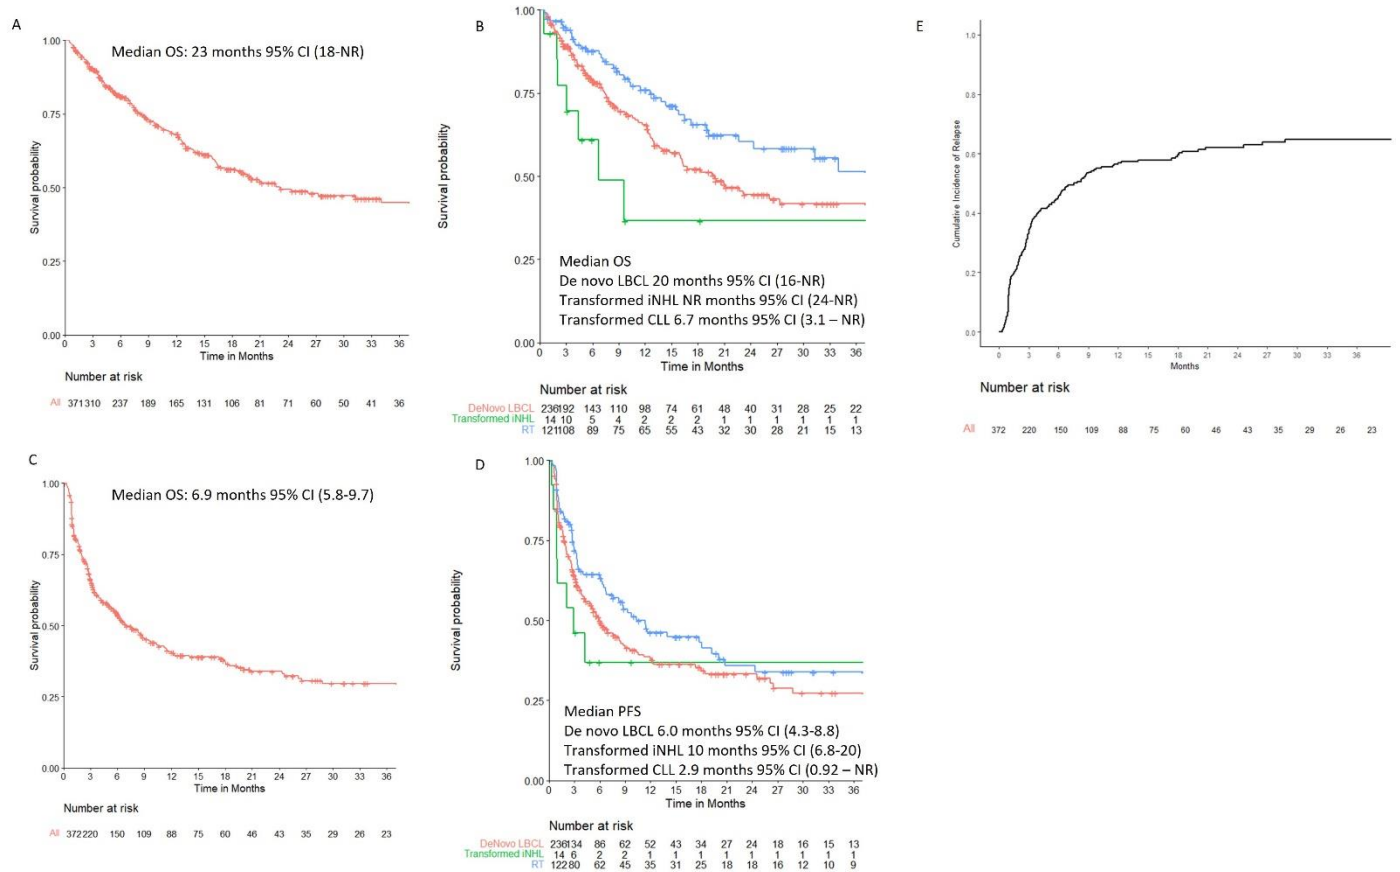

**Survival outcomes according excluding patients treated with POC CAR T . (A)** Overall survival of the cohort. **(B)** Overall survival according to histology. **(C)** Progression Free Survival of the cohort. **(D)** Progression Free Survival according to histology. **(E)** cumulative incidence of relapse for the cohort De novo LBCL: Transformed Low grade NHL and transformed CLL
